# Supplementary figures and images for: Electrolytes at charged interfaces: Ion–ion–interface three-body correlation functions
Source: Royal Society of Chemistry journal article supplement (doi:10.1039/b103910p), 2001-01-01

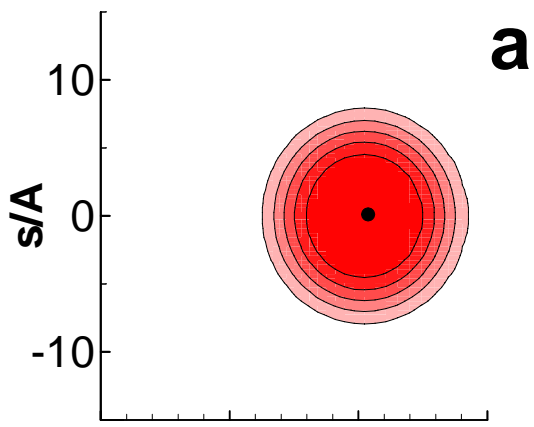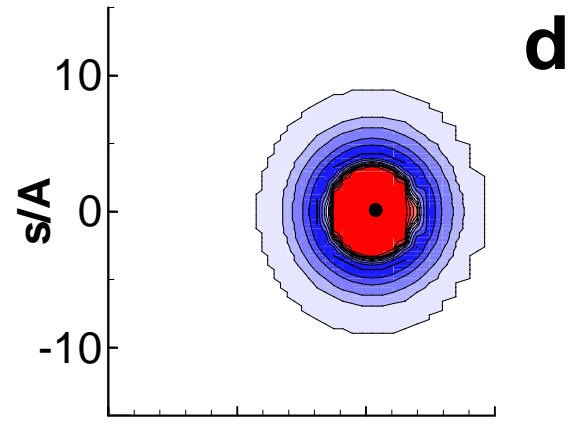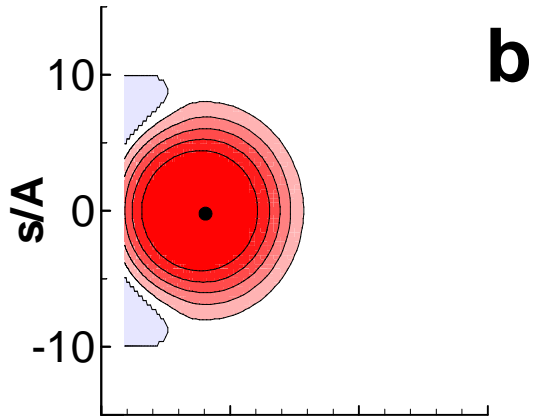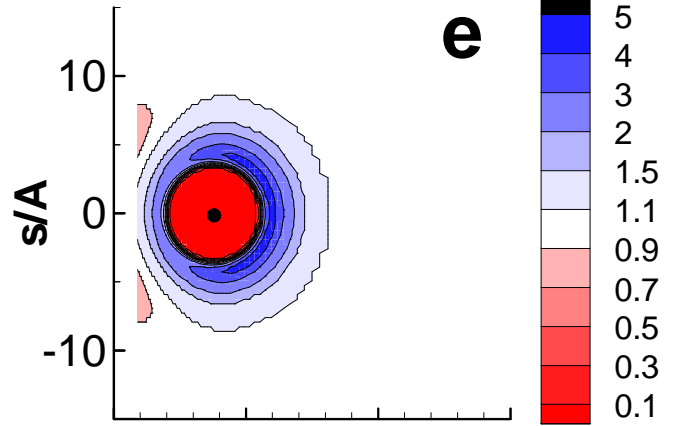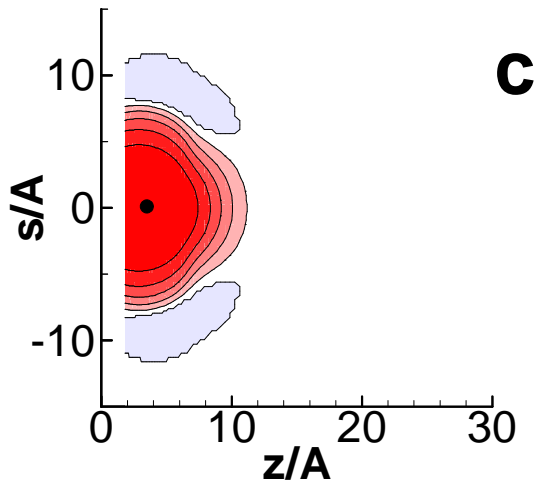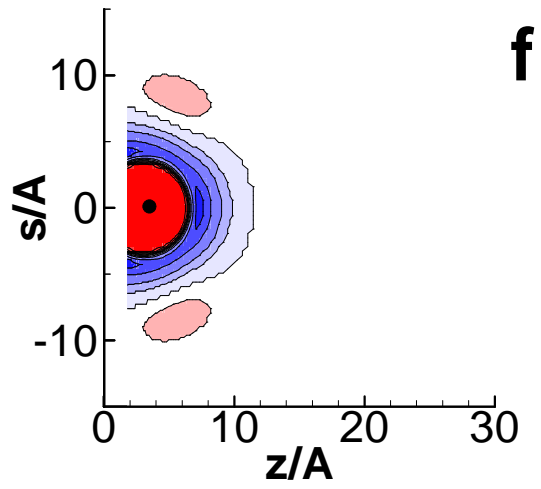

Supplement: fig10.pdf [file fig10.pdf]

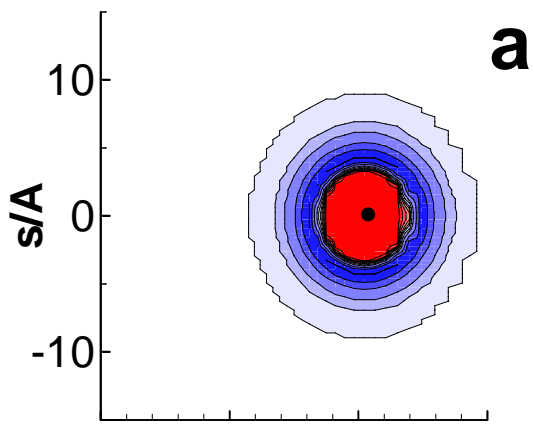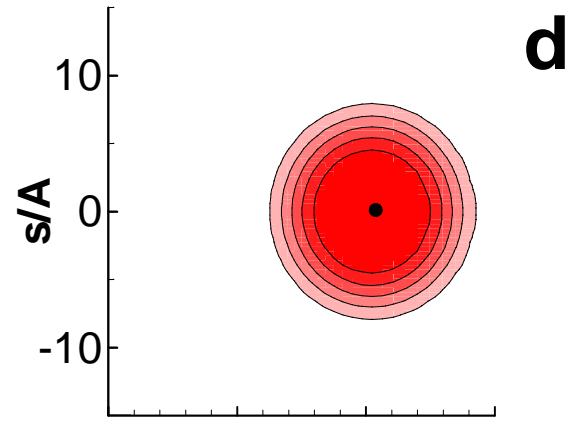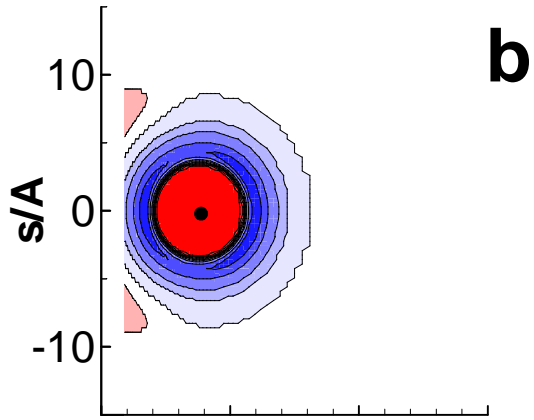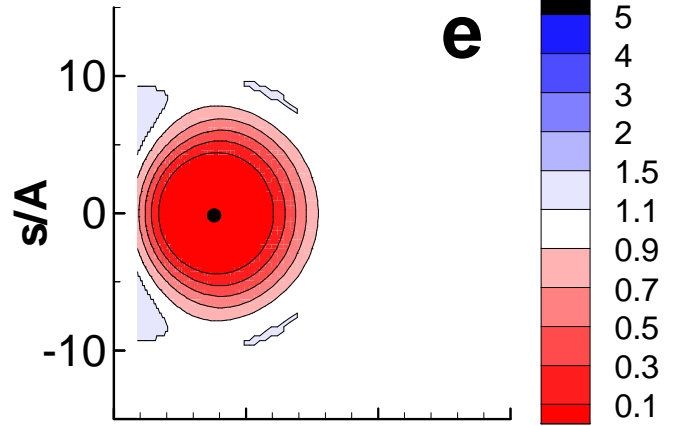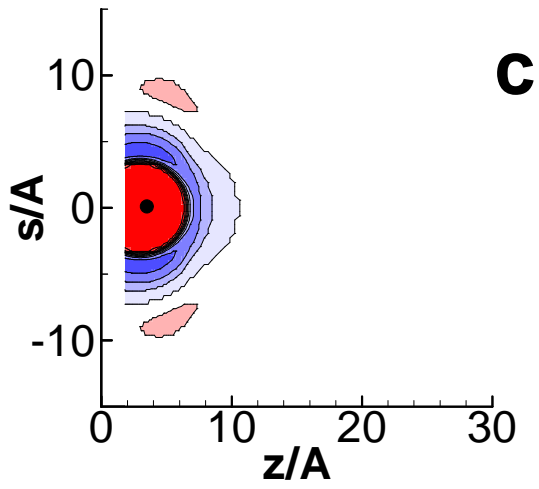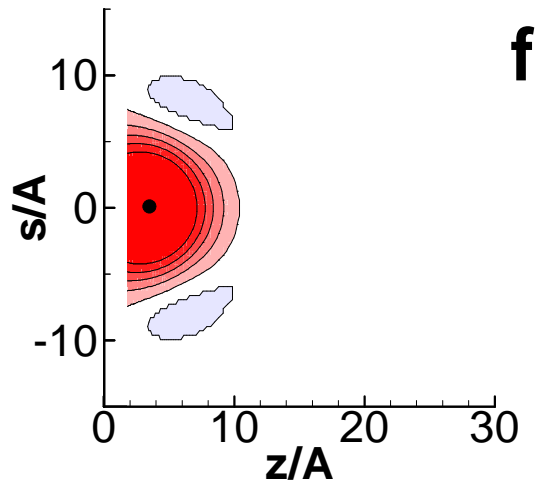

Supplement: fig11.pdf [file fig11.pdf]

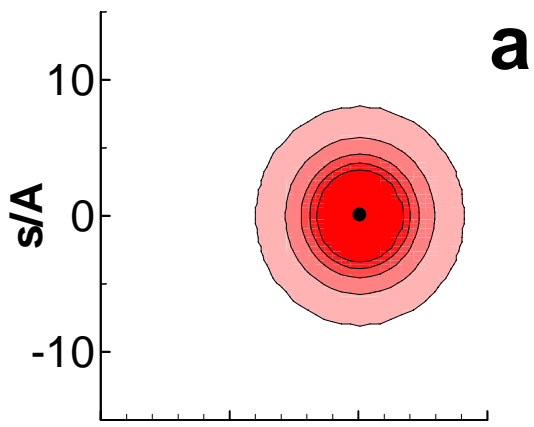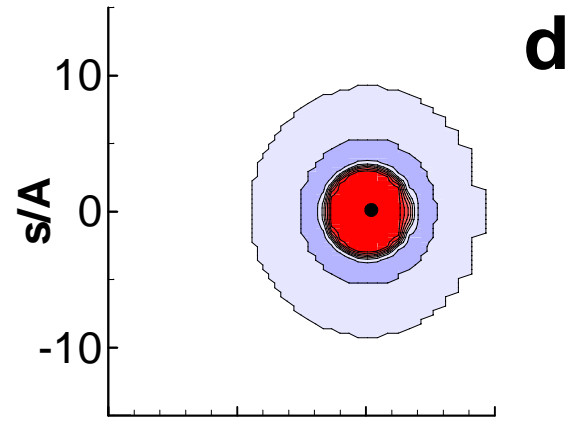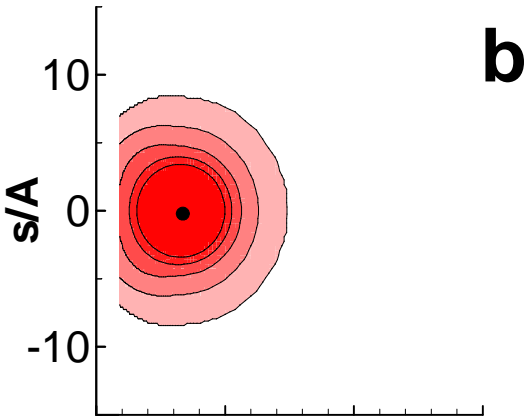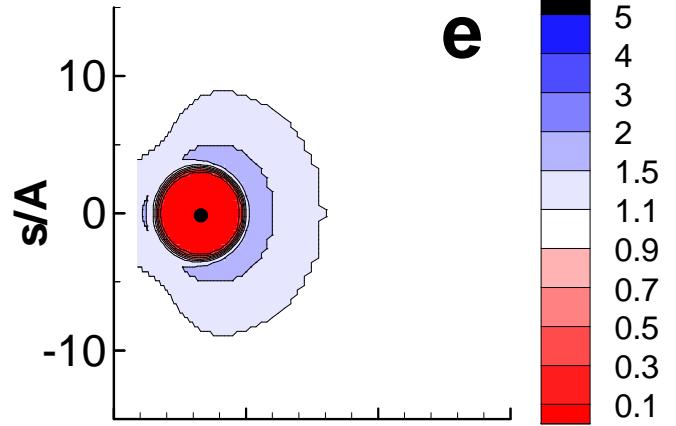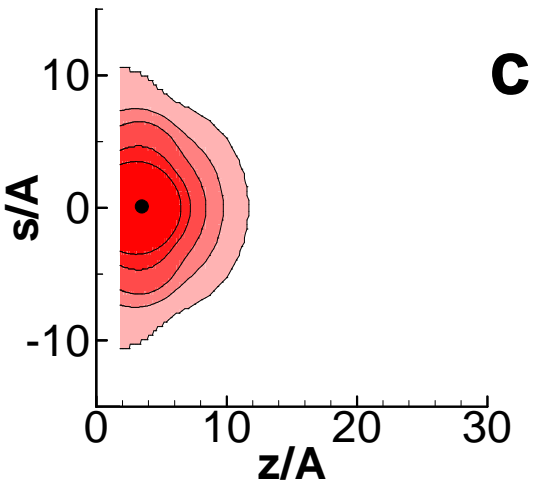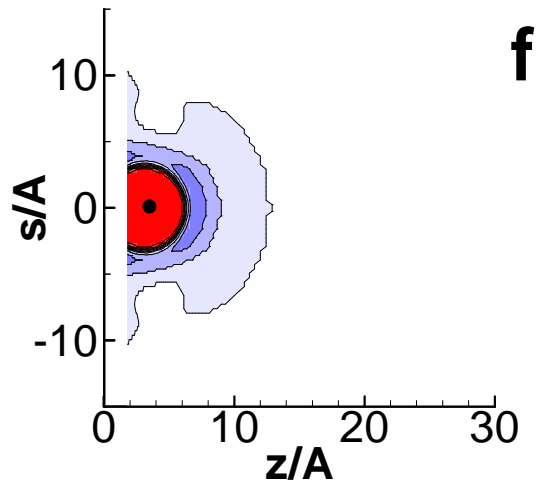

Supplement: fig4.pdf [file fig4.pdf]

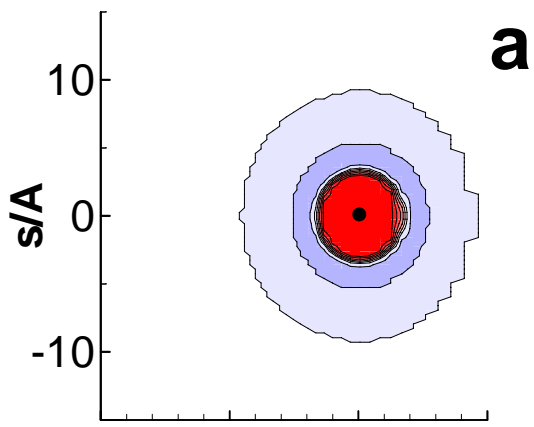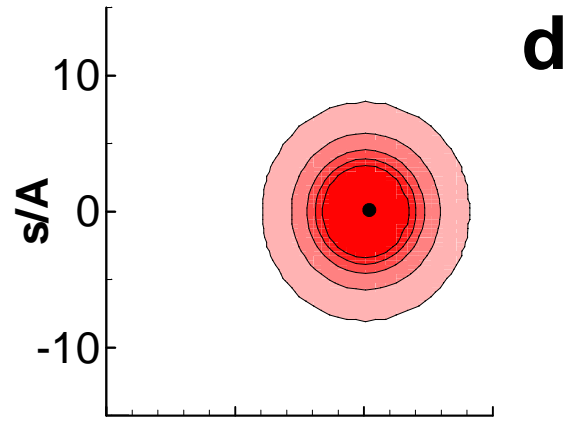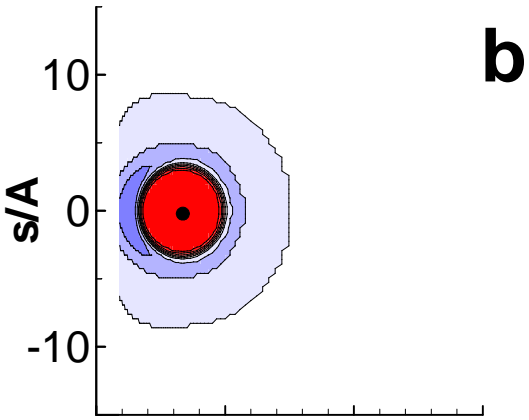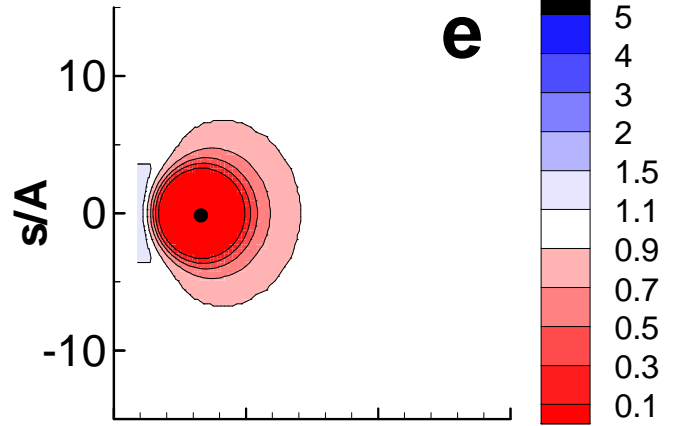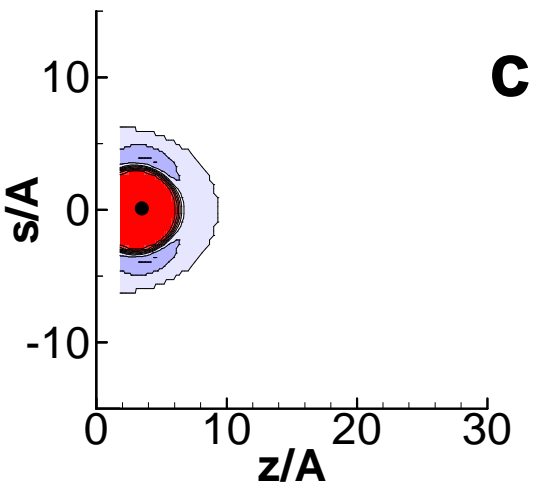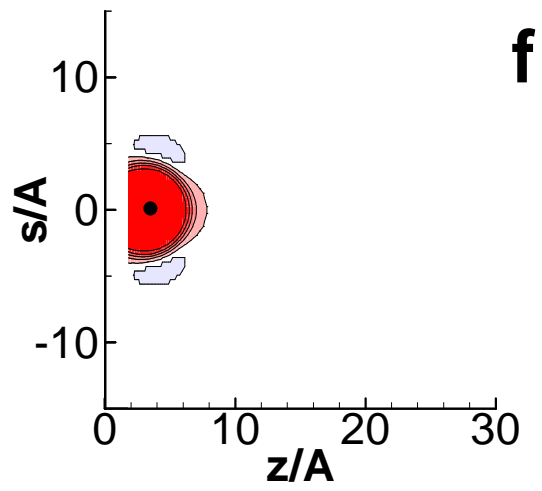

Supplement: fig5.pdf [file fig5.pdf]

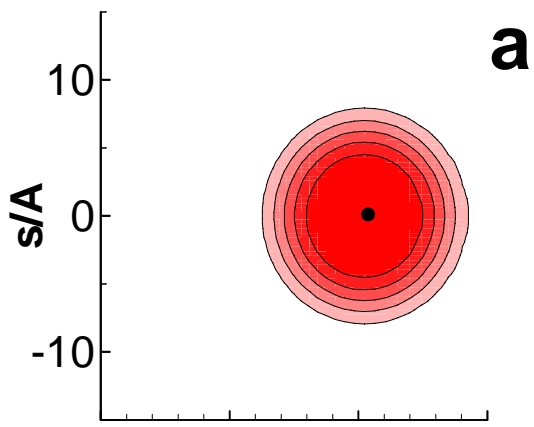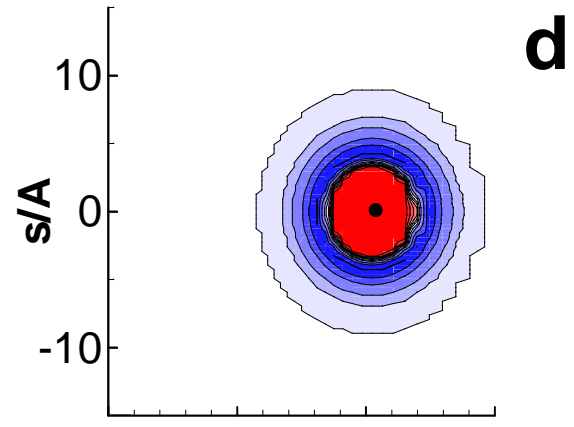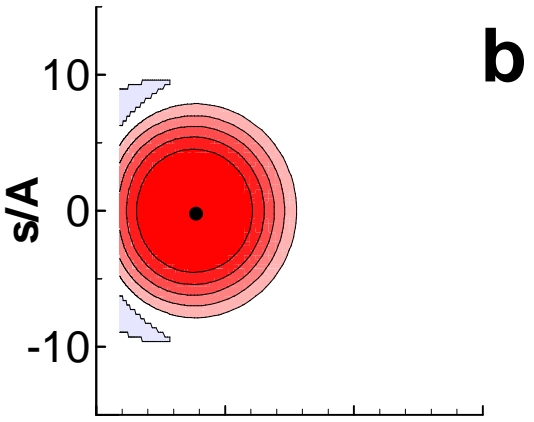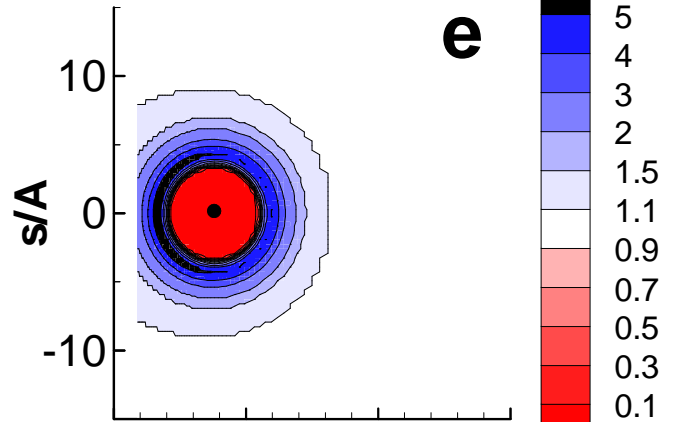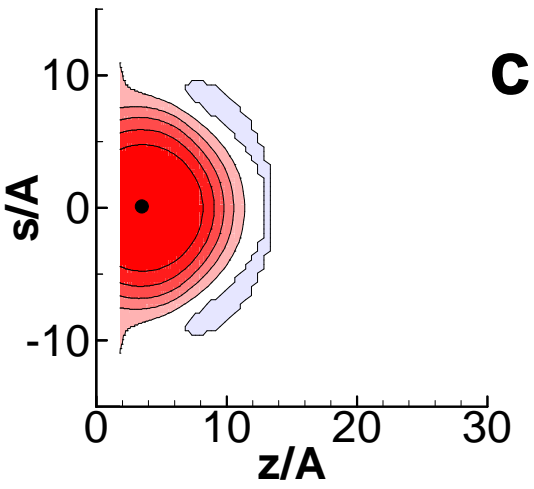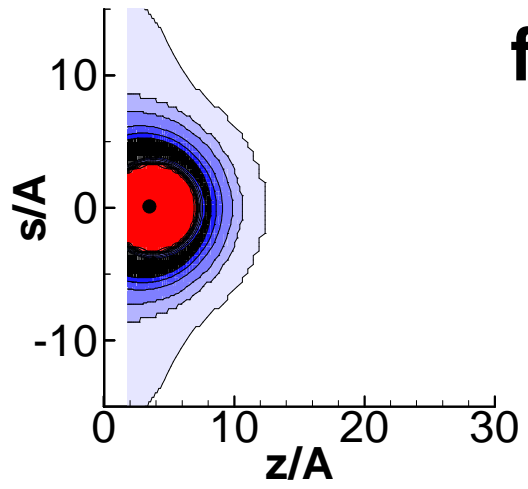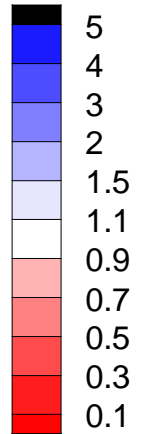

Supplement: fig7.pdf [file fig7.pdf]

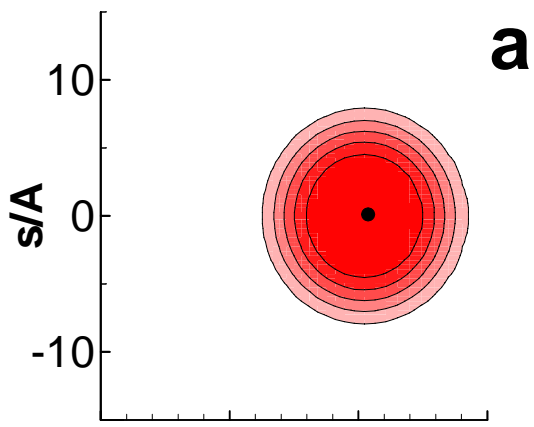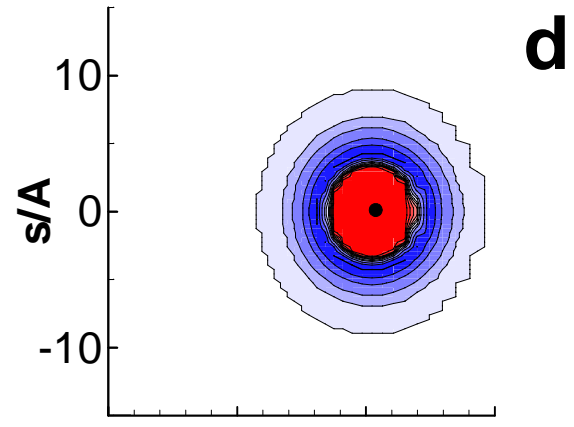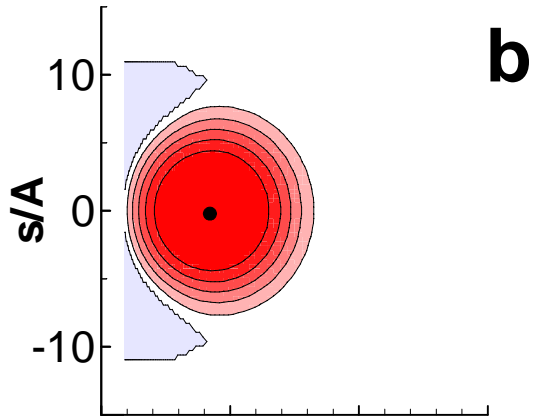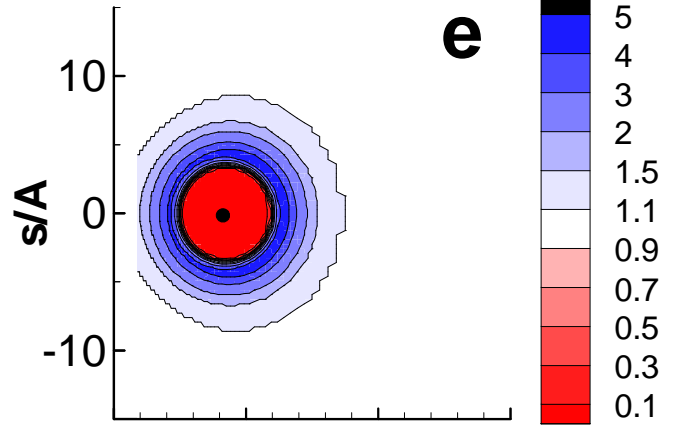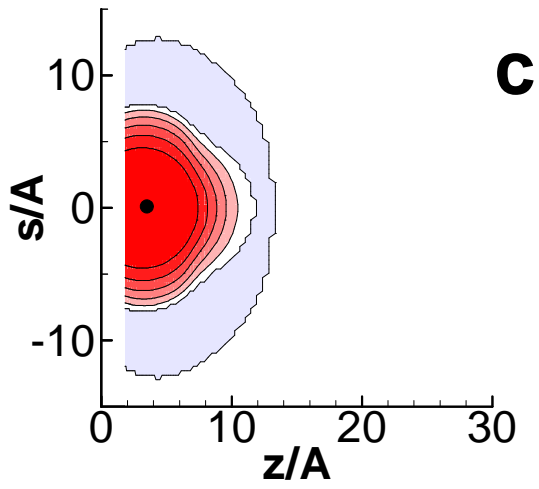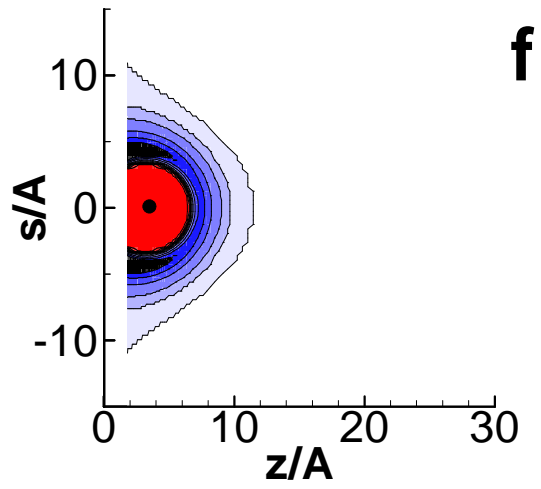

Supplement: fig8.pdf [file fig8.pdf]

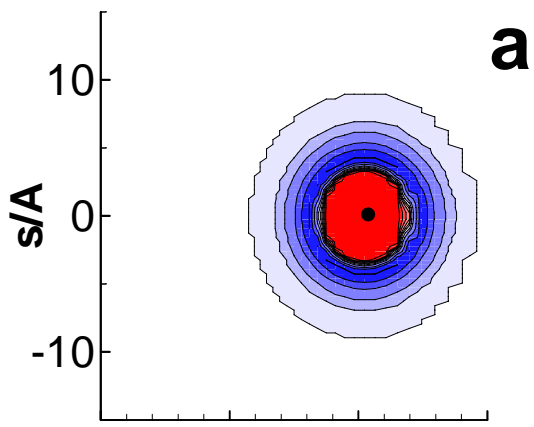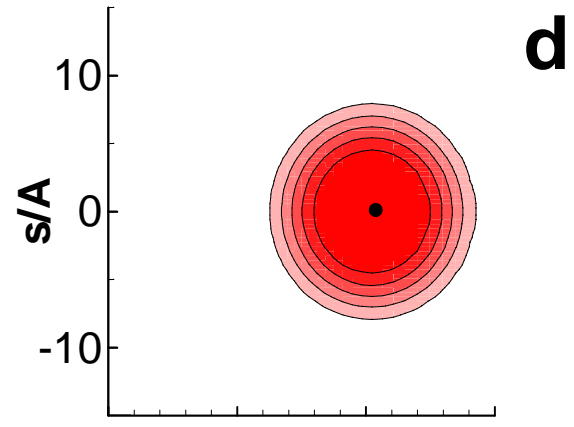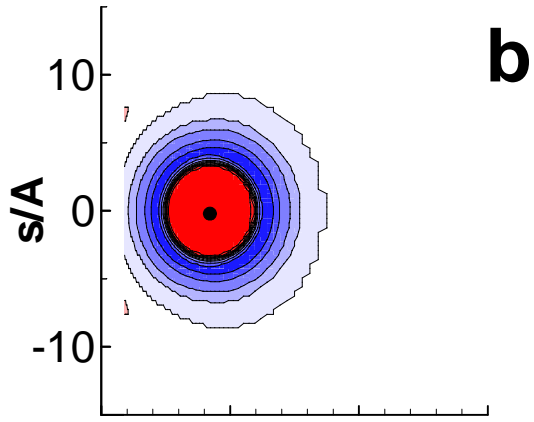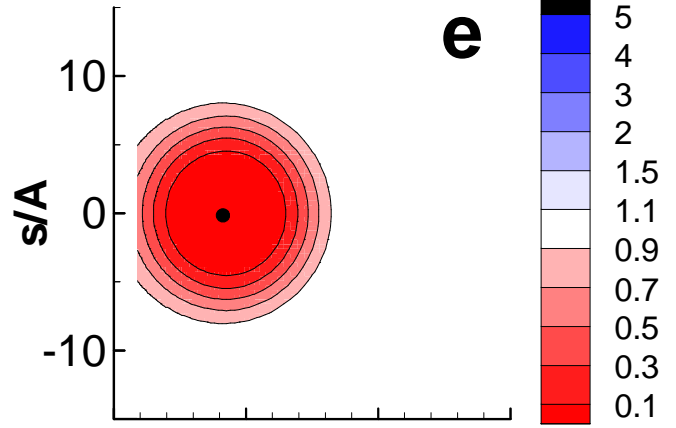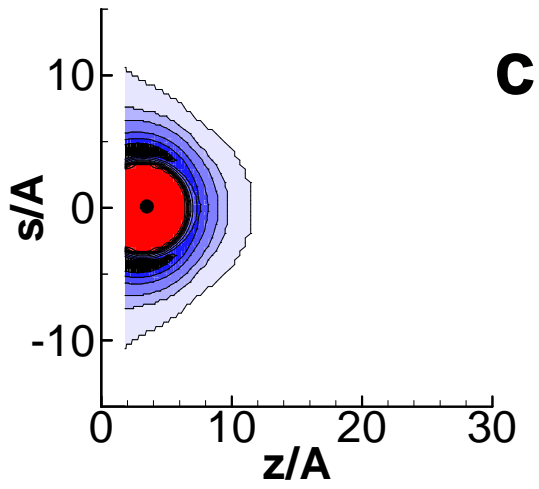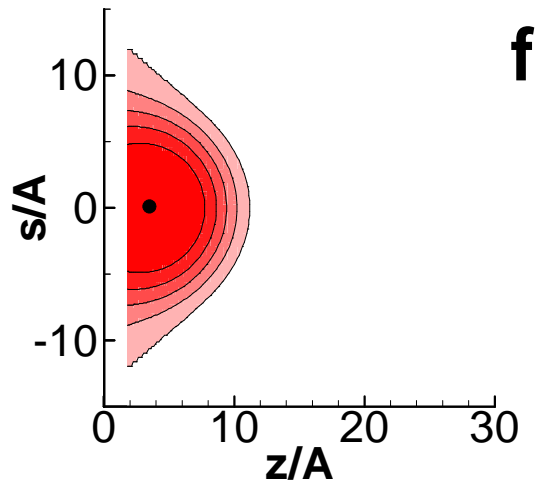

Supplement: fig9.pdf [file fig9.pdf]
